# Supplementary material for: Genome-wide association identifies seven loci for pelvic organ prolapse in Iceland and the UK Biobank
Source: PubMed Central journal article supplement (PMC7078216; doi:10.1038/s42003-020-0857-9), 2020-03-17
Supplement: 42003_2020_857_MOESM1_ESM.pdf [file 42003_2020_857_MOESM1_ESM.pdf]

## Description of Supplementary Data

### Genome-wide association identifies seven loci for pelvic organ prolapse in Iceland and the UK Biobank

Olafsdottir et al.

**Supplementary Data 1:** Demographic information for POP cases and controls in Iceland and the UKBiobank

**Supplementary Data 2:** *P*-value thresholds for genome-wide significance for variants in different annotations classes

**Supplementary Data 3:** Association results for variants reaching genome-wide significance in meta-analysis of pelvic organ prolapse

**Supplementary Data 4:** Association results for the lead variant (rs3791675) at the *EFEMP1* locus on chromosome 2 and a secondary signal detected with a conditional analysis in a meta-analysis of pelvic organ prolapse

**Supplementary Data 5:** Sequence variants reported in previous GWAS studies on POP tested for association with POP in the data from Iceland and UK biobank

**Supplementary Data 6:** Association of POP with variants previously reported to associate with POP in meta-analyses of candidate-gene studies

**Supplementary Data 7:** A summary of surgical procedures and the corresponding codes from the classification of surgical procedures available in the UKB and Icelandic data

**Supplementary Data 8:** Association between POP variants and POP phenotype by definition of POP cases in UK, Iceland and in the combined analysis

**Supplementary Data 9:** Shown are associations of POP index variants with traits previously reported for associations at each of the eight loci (\*) and traits detected using combined data from Iceland and UKB

**Supplementary Data 10:** Previously reported variants that are in LD ( $r^2 > 0.5$ ) with the POP variants detected in the current study and the associated traits

**Supplementary Data 11:** Association of POP index variants with POP phenotypes where leiomyoma and endometriosis cases have been excluded

**Supplementary Data 12:** Co-localization analysis

**Supplementary Data 13:** Association of POP with 32 reported leiomyoma variants

**Supplementary Data 14:** Association of POP with five reported gestational duration variants

**Supplementary Data 15:** Association of POP with 27 reported endometriosis variants

**Supplementary Data 16:** Association of POP with 14 reported sequence variants for Barrett's oesophagus and esophageal adenocarcinoma (BE and AE combined)

**Supplementary Data 17:** Association of POP with 145 reported prostate cancer variants

**Supplementary Data 18:** Association of POP with four reported inguinal hernia variants

**Supplementary Data 19:** Association of POP with 3,273 reported height variants

**Supplementary Data 20:** Association of POP with 52 reported lung function variants

**Supplementary Data 21:** Association of POP with 70 reported waist circumference (BMI-adjusted) variants

**Supplementary Data 22:** Association of POP with 23 reported benign prostatic hyperplasia variants

**Supplementary Data 23:** Association of POP with 152 reported BMI variants

**Supplementary Data 24:** Association of POP with three reported fertility variants

**Supplementary Data 25:** Association results for POP variants using data from UK Biobank with BMI and number of children added separately as covariates

**Supplementary Data 26:** Associations of polygenic risk scores (PRS) for chip-genotyped cases and controls in Iceland and UKB with POP and traits previously reported as risk factors for POP; body mass index (BMI) and number of children

**Supplementary Data 27:** Association results for POP variants in or nearby *EFEMP1* and aging-associated phenotypes

**Supplementary Data 28:** The proportion of diagnosed cases with POP within each of the 9 subgroups of ICD-10 N81 in the data from UK Biobank and from Iceland

**Supplementary Data 29:** Shown are associations of POP index variants with traits previously reported for associations at each of the eight loci (\*) and traits detected using data from Iceland, UKB and the combined datasets
